# Supplementary material
Source: Springer Nature journal article supplement (https://www.springermedizin.de/resource/supplementary/12943_2009_571_MOESM2_ESM.pdf/9555002)

control —●— bortezomib regression trial —●—

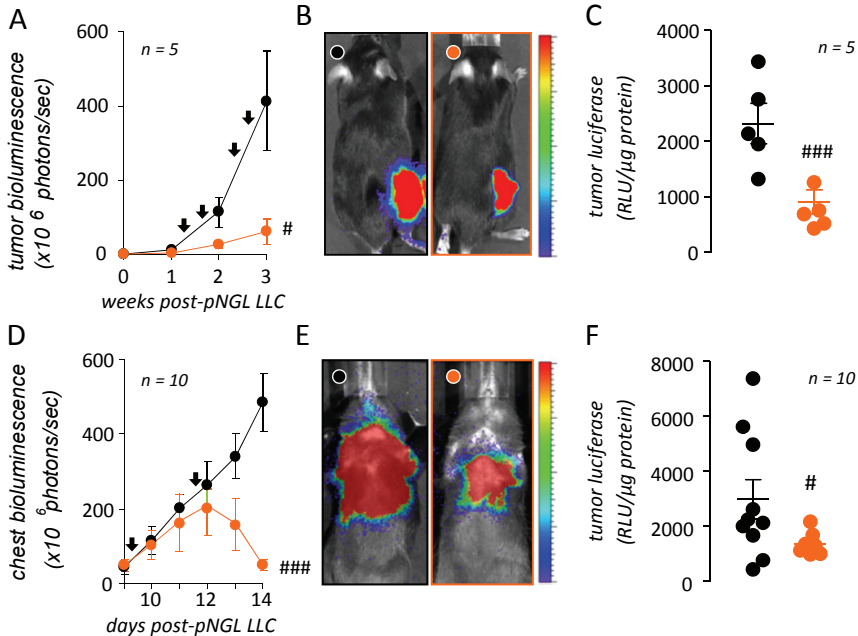

Supplement: MOESM2 [file 9555002]
